# Supplementary material for: Microtopographical assembly of cardiomyocytes
Source: Royal Society of Chemistry journal article supplement (doi:10.1039/c1ib00024a), 2011-08-24
Supplement: c1ib00024a.pdf [file c1ib00024a.pdf]

**Supplemental Movies 1-5. HL-1 cells beating in culture.** Time-lapse phase contrast imaging of HL-1 cells on (1) flat PDMS, (2) rows, (3) dense, (4) sparse, and (5) clusters arrangements, functionalized with gelatin/fibronectin. Movies are 7 seconds in real time from beginning to end.
